# Supplementary material for: Increased Biosynthetic Gene Dosage in a Genome-Reduced Defensive Bacterial Symbiont
Source: PubMed Central journal article supplement (PMC5698493; doi:10.1128/msystems.00096-17), 2017-11-21

A

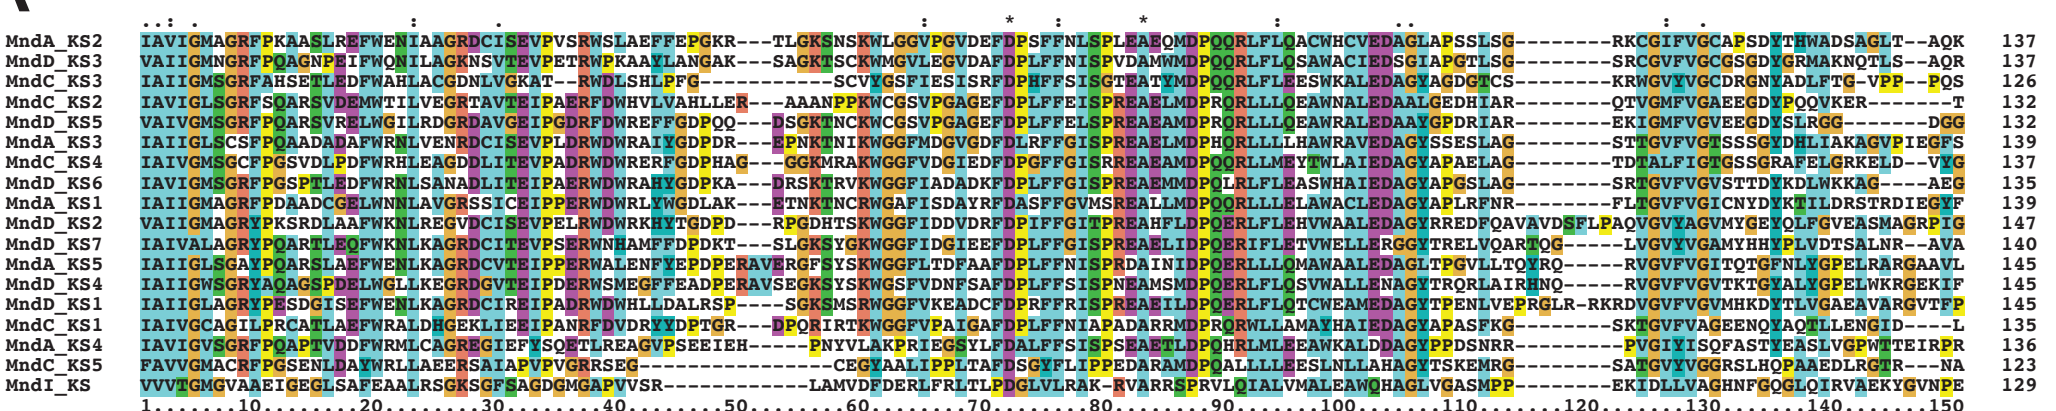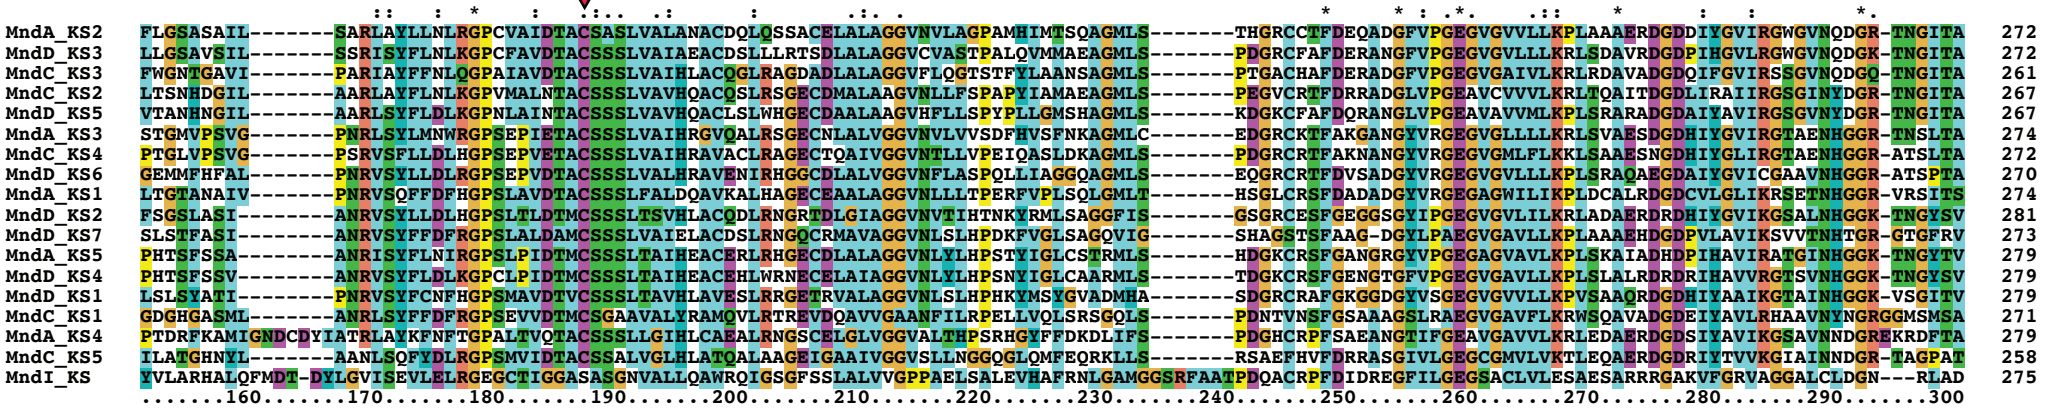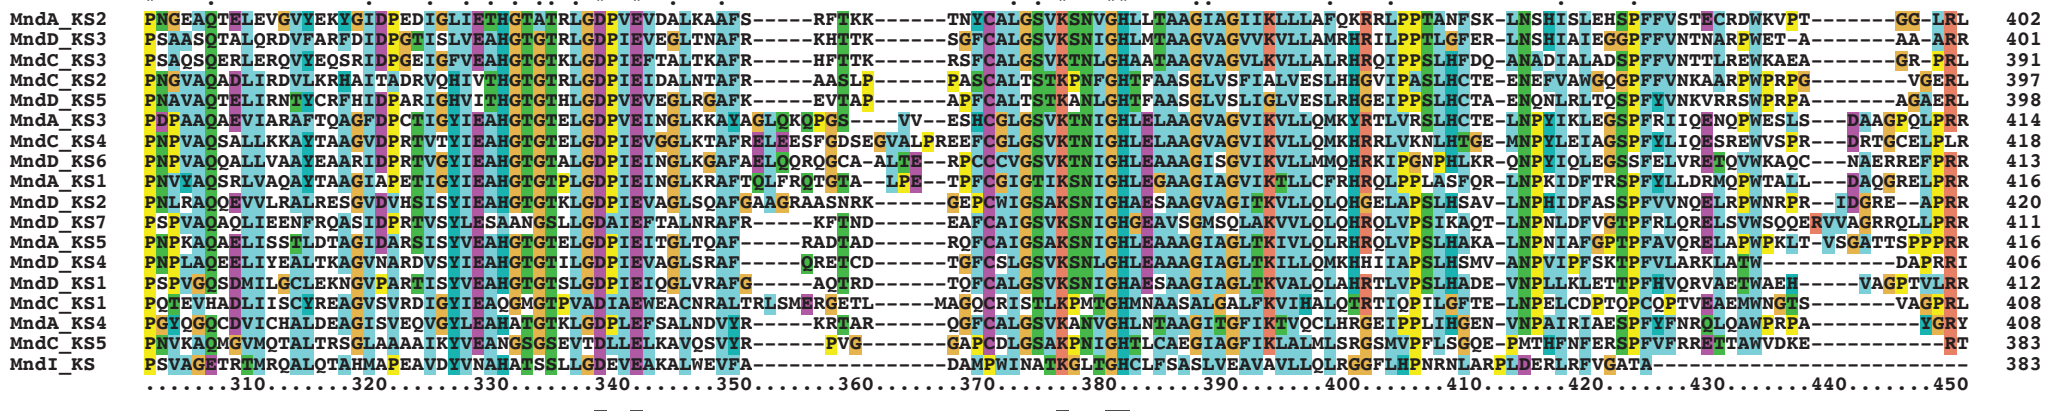

B

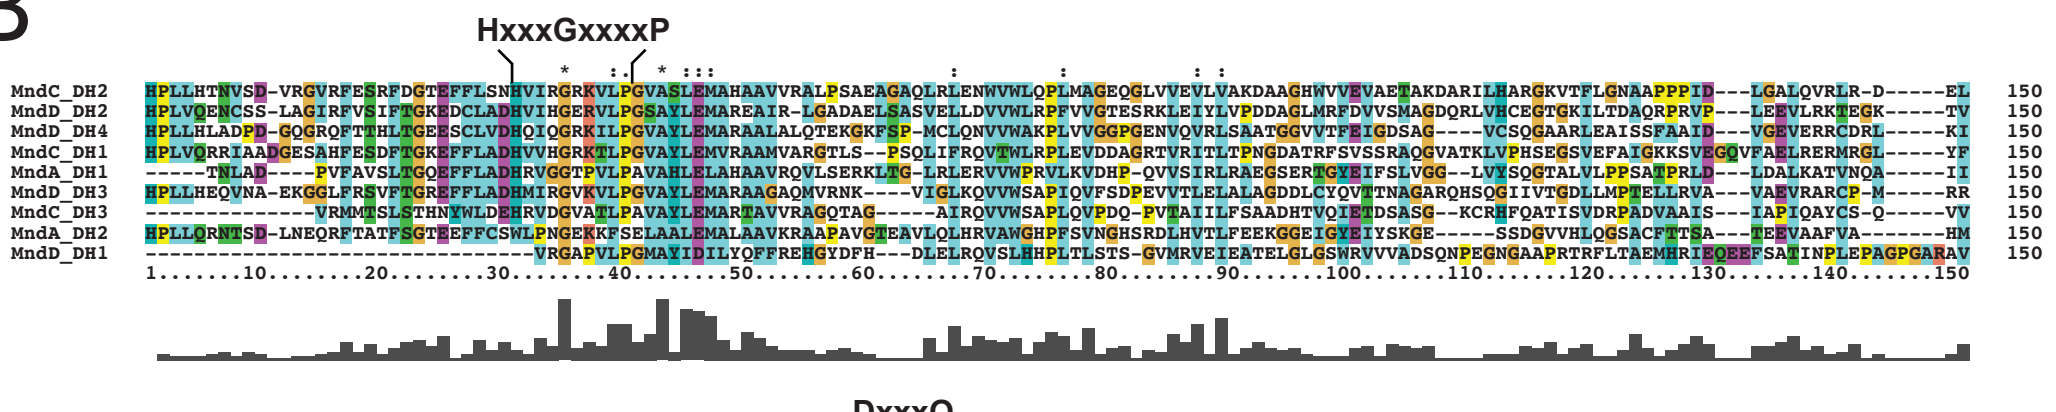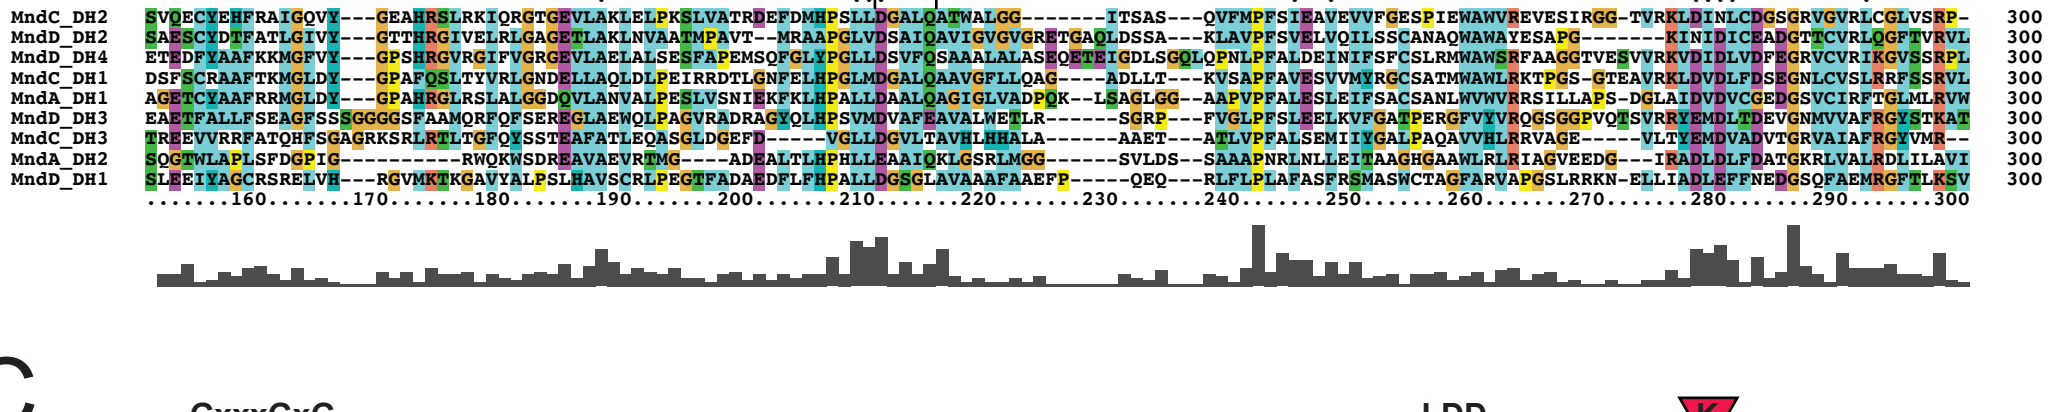

C

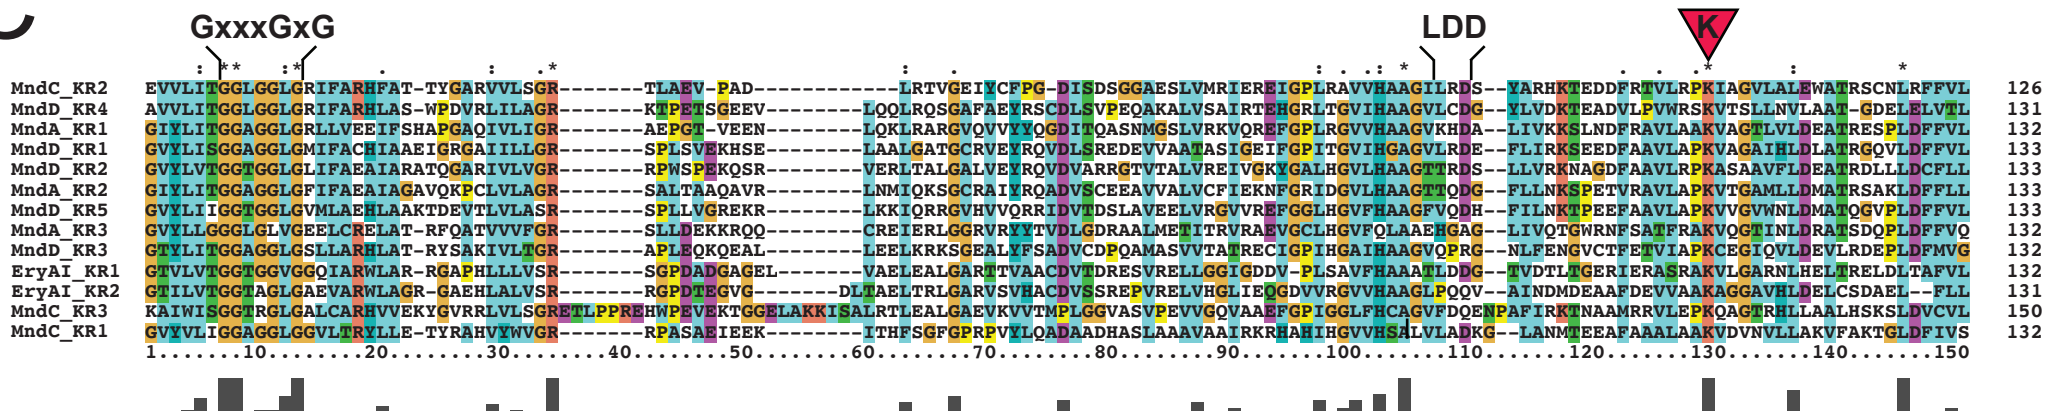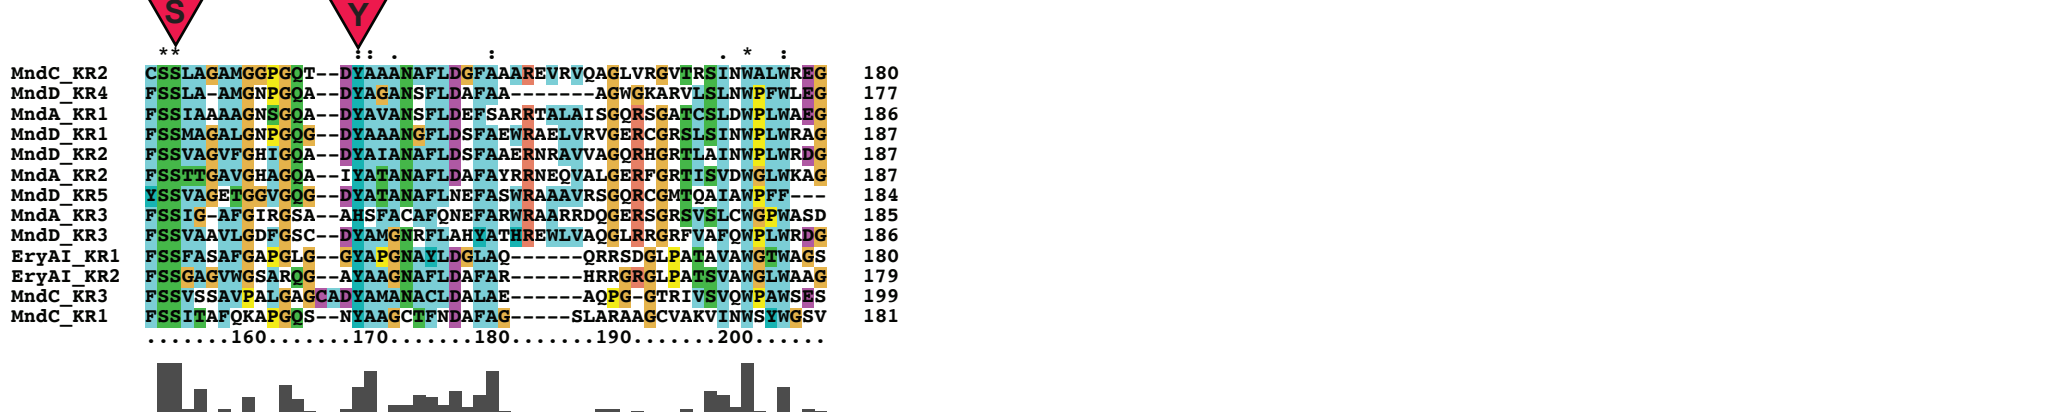

D

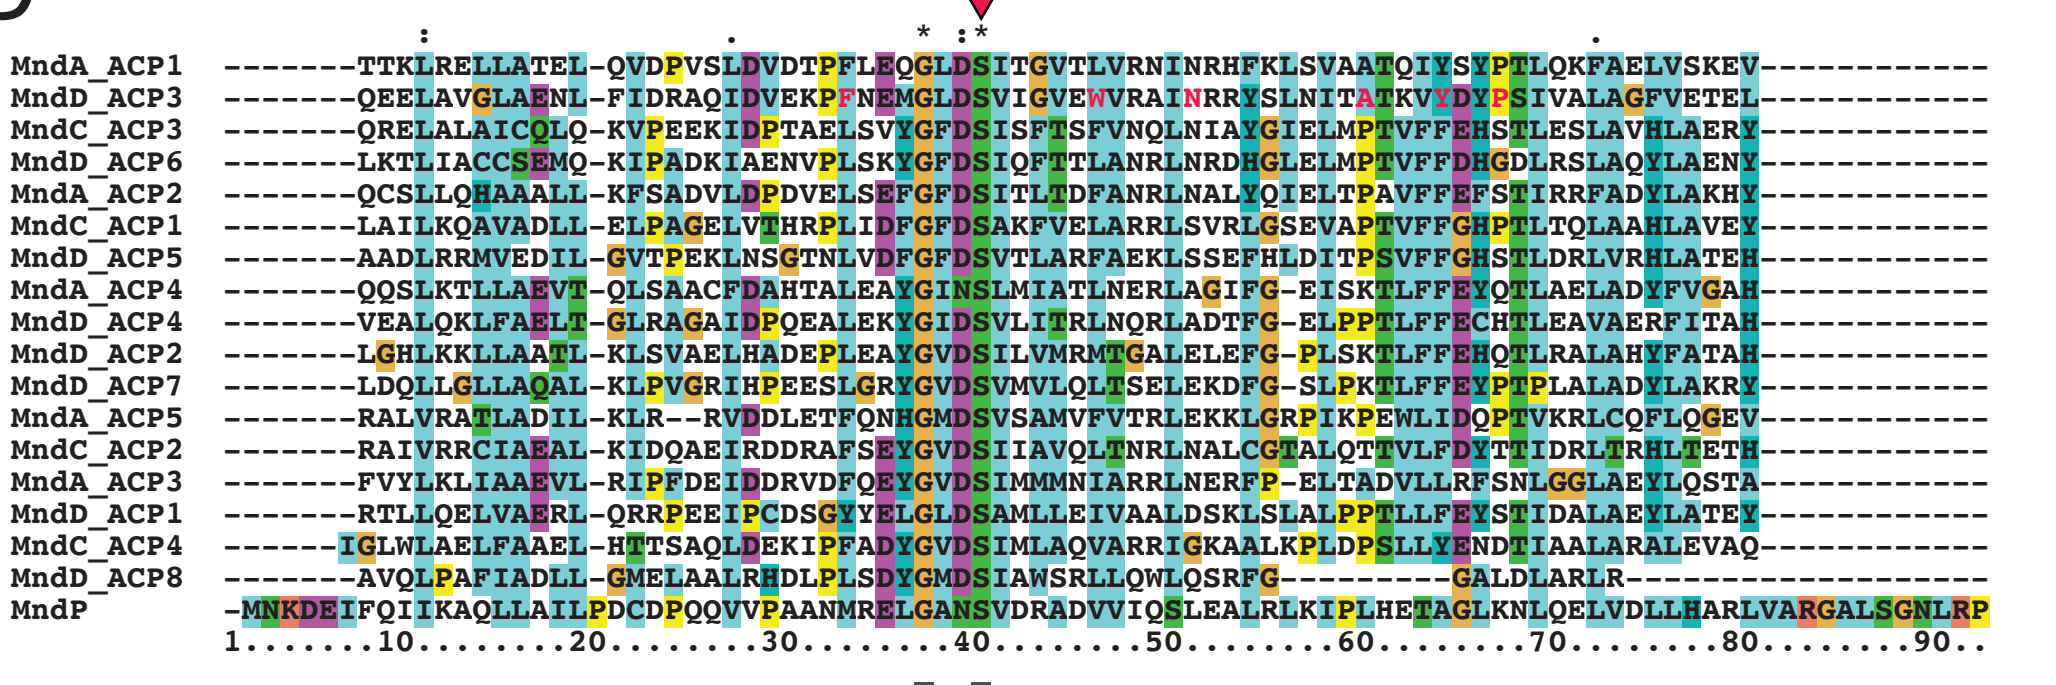

Supplement: sys006172154sf5.pdf [file sys006172154sf5.pdf]
