# Supplementary material for: Increased Biosynthetic Gene Dosage in a Genome-Reduced Defensive Bacterial Symbiont
Source: PubMed Central journal article supplement (PMC5698493; doi:10.1128/msystems.00096-17), 2017-11-21
Supplement: sys006172154sf8.pdf [file sys006172154sf8.pdf]

COX1  
Amplicon 1

|                                          | <i>Lissoclinum</i> sp. TIC-2013-079 | <i>Lissoclinum patella</i> L6 AHZ94369.1 | <i>Lissoclinum patella</i> L5 AHZ94363.1 | <i>Lissoclinum patella</i> L2 AHZ94350.1 | <i>Lissoclinum punctatum</i> BAG71823.1 | <i>Lissoclinum bistratum</i> BAI99553.1 | <i>Lissoclinum timorense</i> BAI99558.1 | <i>Lissoclinum timorense</i> BAI99557.1 | <i>Lissoclinum bistratum</i> BAG71824.1 | <i>Lissoclinum timorense</i> BAI99556.1 | <i>Lissoclinum bistratum</i> BAI99555.1 | <i>Lissoclinum bistratum</i> BAI99554.1 | <i>Lissoclinum patella</i> BAK32991.1 |
|------------------------------------------|-------------------------------------|------------------------------------------|------------------------------------------|------------------------------------------|-----------------------------------------|-----------------------------------------|-----------------------------------------|-----------------------------------------|-----------------------------------------|-----------------------------------------|-----------------------------------------|-----------------------------------------|---------------------------------------|
| <i>Lissoclinum</i> sp. TIC-2013-079      | 100                                 | 73                                       | 73                                       | 72.4                                     | 82.2                                    | 77.7                                    | 78                                      | 77.8                                    | 77.4                                    | 76.7                                    | 76.7                                    | 77.2                                    | 75.7                                  |
| <i>Lissoclinum patella</i> L6 AHZ94369.1 | 73                                  | 100                                      | 100                                      | 85.9                                     | 77.7                                    | 83.2                                    | 83.4                                    | 83.5                                    | 83.5                                    | 82.9                                    | 82.9                                    | 82.9                                    | 87.2                                  |
| <i>Lissoclinum patella</i> L5 AHZ94363.1 | 73                                  | 100                                      | 100                                      | 85.9                                     | 77.7                                    | 83.2                                    | 83.4                                    | 83.5                                    | 83.5                                    | 82.9                                    | 82.9                                    | 82.9                                    | 87.2                                  |
| <i>Lissoclinum patella</i> L2 AHZ94350.1 | 72.4                                | 85.9                                     | 85.9                                     | 100                                      | 75.7                                    | 82.7                                    | 82.9                                    | 82.8                                    | 82.7                                    | 81.7                                    | 81.7                                    | 81.7                                    | 85.5                                  |
| <i>Lissoclinum punctatum</i> BAG71823.1  | 82.2                                | 77.7                                     | 77.7                                     | 75.7                                     | 100                                     | 78.2                                    | 78.4                                    | 78.5                                    | 78.2                                    | 75.7                                    | 75.7                                    | 75.7                                    | 76.2                                  |
| <i>Lissoclinum bistratum</i> BAI99553.1  | 77.7                                | 83.2                                     | 83.2                                     | 82.7                                     | 78.2                                    | 100                                     | 99.8                                    | 99.8                                    | 99.5                                    | 83.9                                    | 83.9                                    | 83.9                                    | 81.5                                  |
| <i>Lissoclinum timorense</i> BAI99558.1  | 78                                  | 83.4                                     | 83.4                                     | 82.9                                     | 78.4                                    | 99.8                                    | 100                                     | 100                                     | 99.7                                    | 84.2                                    | 84.2                                    | 84.2                                    | 81.7                                  |
| <i>Lissoclinum timorense</i> BAI99557.1  | 77.8                                | 83.5                                     | 83.5                                     | 82.8                                     | 78.5                                    | 99.8                                    | 100                                     | 100                                     | 99.7                                    | 84.3                                    | 84.3                                    | 84                                      | 81.8                                  |
| <i>Lissoclinum bistratum</i> BAG71824.1  | 77.4                                | 83.5                                     | 83.5                                     | 82.7                                     | 78.2                                    | 99.5                                    | 99.7                                    | 99.7                                    | 100                                     | 83.7                                    | 83.7                                    | 83.7                                    | 82                                    |
| <i>Lissoclinum timorense</i> BAI99556.1  | 76.7                                | 82.9                                     | 82.9                                     | 81.7                                     | 75.7                                    | 83.9                                    | 84.2                                    | 84.3                                    | 83.7                                    | 100                                     | 100                                     | 99.5                                    | 82.5                                  |
| <i>Lissoclinum bistratum</i> BAI99555.1  | 76.7                                | 82.9                                     | 82.9                                     | 81.7                                     | 75.7                                    | 83.9                                    | 84.2                                    | 84.3                                    | 83.7                                    | 100                                     | 100                                     | 99.5                                    | 82.5                                  |
| <i>Lissoclinum bistratum</i> BAI99554.1  | 77.2                                | 82.9                                     | 82.9                                     | 81.7                                     | 75.7                                    | 83.9                                    | 84.2                                    | 84                                      | 83.7                                    | 99.5                                    | 99.5                                    | 100                                     | 82.5                                  |
| <i>Lissoclinum patella</i> BAK32991.1    | 75.7                                | 87.2                                     | 87.2                                     | 85.5                                     | 76.2                                    | 81.5                                    | 81.7                                    | 81.8                                    | 82                                      | 82.5                                    | 82.5                                    | 82.5                                    | 100                                   |

COX1  
Amplicon 2

|                                               | <i>Lissoclinum</i> sp. TIC-2013-079 | <i>Lissoclinum patella</i> L6 AHZ94369.1 | <i>Lissoclinum patella</i> L5 AHZ94363.1 | <i>Lissoclinum patella</i> L2 AHZ94350.1 | <i>Lissoclinum patella</i> 07-110 AHZ18353.1 | <i>Lissoclinum patella</i> 07-005 AHZ18352.1 | <i>Lissoclinum patella</i> 07-002B AHZ18351.1 | <i>Lissoclinum patella</i> 03-005 AHZ18350.1 | <i>Lissoclinum patella</i> 07-103 AHZ18349.1 | <i>Lissoclinum patella</i> L4 AHZ18348.1 | <i>Lissoclinum patella</i> E11-097 AHZ18347.1 | <i>Lissoclinum patella</i> 05-044 AHZ18346.1 | <i>Lissoclinum patella</i> 05-027 AHZ18345.1 | <i>Lissoclinum patella</i> 05-039 AHZ18344.1 | <i>Lissoclinum patella</i> 05-033 AHZ18343.1 | <i>Lissoclinum patella</i> L3 AHZ18342.1 | <i>Lissoclinum verrilli</i> AGF29554.1 |
|-----------------------------------------------|-------------------------------------|------------------------------------------|------------------------------------------|------------------------------------------|----------------------------------------------|----------------------------------------------|-----------------------------------------------|----------------------------------------------|----------------------------------------------|------------------------------------------|-----------------------------------------------|----------------------------------------------|----------------------------------------------|----------------------------------------------|----------------------------------------------|------------------------------------------|----------------------------------------|
| <i>Lissoclinum</i> sp. TIC-2013-079           | 100                                 | 73                                       | 73                                       | 72.4                                     | 72.5                                         | 73.3                                         | 72.6                                          | 72.8                                         | 73.7                                         | 74.7                                     | 71.9                                          | 74.5                                         | 74.4                                         | 74.4                                         | 74.5                                         | 73.5                                     | 75.3                                   |
| <i>Lissoclinum patella</i> L6 AHZ94369.1      | 73                                  | 100                                      | 100                                      | 85.9                                     | 81.1                                         | 81                                           | 80.7                                          | 81                                           | 81.6                                         | 82.4                                     | 81.5                                          | 83.5                                         | 83.1                                         | 83.1                                         | 83.1                                         | 88                                       | 67.5                                   |
| <i>Lissoclinum patella</i> L5 AHZ94363.1      | 73                                  | 100                                      | 100                                      | 85.9                                     | 81.1                                         | 81                                           | 80.7                                          | 81                                           | 81.6                                         | 82.4                                     | 81.5                                          | 83.5                                         | 83.1                                         | 83.1                                         | 83.1                                         | 88                                       | 67.5                                   |
| <i>Lissoclinum patella</i> L2 AHZ94350.1      | 72.4                                | 85.9                                     | 85.9                                     | 100                                      | 81.5                                         | 81.8                                         | 81.1                                          | 81.3                                         | 82.1                                         | 82.5                                     | 80.9                                          | 82.7                                         | 82.8                                         | 82.8                                         | 82.4                                         | 86.4                                     | 66.5                                   |
| <i>Lissoclinum patella</i> 07-110 AHZ18353.1  | 72.5                                | 81.1                                     | 81.1                                     | 81.5                                     | 100                                          | 98.1                                         | 98                                            | 98.1                                         | 97.9                                         | 97.8                                     | 88.2                                          | 90.1                                         | 90.4                                         | 90.4                                         | 90.1                                         | 81.8                                     | 65.4                                   |
| <i>Lissoclinum patella</i> 07-005 AHZ18352.1  | 73.3                                | 81                                       | 81                                       | 81.8                                     | 98.1                                         | 100                                          | 99.8                                          | 99.6                                         | 98.5                                         | 98.5                                     | 88.6                                          | 90.5                                         | 91                                           | 90.8                                         | 90.8                                         | 82.4                                     | 65.6                                   |
| <i>Lissoclinum patella</i> 07-002B AHZ18351.1 | 72.6                                | 80.7                                     | 80.7                                     | 81.1                                     | 98                                           | 99.8                                         | 100                                           | 99.4                                         | 98.3                                         | 98.4                                     | 88.5                                          | 90.2                                         | 90.8                                         | 90.5                                         | 90.5                                         | 82.3                                     | 65.6                                   |
| <i>Lissoclinum patella</i> 03-005 AHZ18350.1  | 72.8                                | 81                                       | 81                                       | 81.3                                     | 98.1                                         | 99.6                                         | 99.4                                          | 100                                          | 98.4                                         | 98.3                                     | 88.6                                          | 90.4                                         | 90.9                                         | 90.7                                         | 90.6                                         | 82.4                                     | 65.8                                   |
| <i>Lissoclinum patella</i> 07-103 AHZ18349.1  | 73.7                                | 81.6                                     | 81.6                                     | 82.1                                     | 97.9                                         | 98.5                                         | 98.3                                          | 98.4                                         | 100                                          | 100                                      | 88.9                                          | 91.2                                         | 91.3                                         | 91.3                                         | 91.2                                         | 82.4                                     | 66.5                                   |
| <i>Lissoclinum patella</i> L4 AHZ18348.1      | 74.7                                | 82.4                                     | 82.4                                     | 82.5                                     | 97.8                                         | 98.5                                         | 98.4                                          | 98.3                                         | 100                                          | 100                                      | 88.9                                          | 91.5                                         | 91.5                                         | 91.5                                         | 91.5                                         | 82.4                                     | 68.6                                   |
| <i>Lissoclinum patella</i> E11-097 AHZ18347.1 | 71.9                                | 81.5                                     | 81.5                                     | 80.9                                     | 88.2                                         | 88.6                                         | 88.5                                          | 88.6                                         | 88.9                                         | 88.9                                     | 100                                           | 95.3                                         | 95.6                                         | 95.3                                         | 95.1                                         | 80                                       | 67.5                                   |
| <i>Lissoclinum patella</i> 05-044 AHZ18346.1  | 74.5                                | 83.5                                     | 83.5                                     | 82.7                                     | 90.1                                         | 90.5                                         | 90.2                                          | 90.4                                         | 91.2                                         | 91.5                                     | 95.3                                          | 100                                          | 99.8                                         | 99.8                                         | 99.4                                         | 82                                       | 66.4                                   |
| <i>Lissoclinum patella</i> 05-027 AHZ18345.1  | 74.4                                | 83.1                                     | 83.1                                     | 82.8                                     | 90.4                                         | 91                                           | 90.8                                          | 90.9                                         | 91.3                                         | 91.5                                     | 95.6                                          | 99.8                                         | 100                                          | 99.8                                         | 99.4                                         | 82.3                                     | 67.1                                   |
| <i>Lissoclinum patella</i> 05-039 AHZ18344.1  | 74.4                                | 83.1                                     | 83.1                                     | 82.8                                     | 90.4                                         | 90.8                                         | 90.5                                          | 90.7                                         | 91.3                                         | 91.5                                     | 95.3                                          | 99.8                                         | 99.8                                         | 100                                          | 99.4                                         | 82.3                                     | 66.9                                   |
| <i>Lissoclinum patella</i> 05-033 AHZ18343.1  | 74.5                                | 83.1                                     | 83.1                                     | 82.4                                     | 90.1                                         | 90.8                                         | 90.5                                          | 90.6                                         | 91.2                                         | 91.5                                     | 95.1                                          | 99.4                                         | 99.4                                         | 99.4                                         | 100                                          | 82.4                                     | 67                                     |
| <i>Lissoclinum patella</i> L3 AHZ18342.1      | 73.5                                | 88                                       | 88                                       | 86.4                                     | 81.8                                         | 82.4                                         | 82.3                                          | 82.4                                         | 82.4                                         | 82.4                                     | 80                                            | 82                                           | 82.3                                         | 82.3                                         | 82.4                                         | 100                                      | 69                                     |
| <i>Lissoclinum verrilli</i> AGF29554.1        | 75.3                                | 67.5                                     | 67.5                                     | 66.5                                     | 65.4                                         | 65.6                                         | 65.6                                          | 65.8                                         | 66.5                                         | 68.6                                     | 67.5                                          | 66.4                                         | 67.1                                         | 66.9                                         | 67                                           | 69                                       | 100                                    |
