# Supplementary material for: Increased Biosynthetic Gene Dosage in a Genome-Reduced Defensive Bacterial Symbiont
Source: PubMed Central journal article supplement (PMC5698493; doi:10.1128/msystems.00096-17), 2017-11-21
Supplement: sys006172154st9.pdf [file sys006172154st9.pdf]

**Table S1** Comparison of repeat structure in symbionts and free-living bacteria

| Strain                                        | Genome length (bp) | Repeat length (bp) | Repeat length (%) | Life-style* | No. Repeat loci | Repeat loci N50 | Longest repeat locus (bp) |
|-----------------------------------------------|--------------------|--------------------|-------------------|-------------|-----------------|-----------------|---------------------------|
| <i>Spiroplasma citri</i> R8-A2                | 1640878            | 666844             | 40.64             | F           | 212             | 6597            | 40155                     |
| <i>Sodalis glossinidius</i> morsitans         | 4292502            | 580517             | 13.52             | F           | 400             | 2814            | 14279                     |
| “ <i>Candidatus</i> Didemnitutus mandela”     | 2684137            | 513494             | 19.13             | T           | 5               |                 | 108264                    |
| “ <i>Candidatus</i> Hamiltonella defensa 5AT” | 2169363            | 403291             | 18.59             | T           | 277             | 2743            | 21540                     |
| <i>Wolbachia</i> wCle                         | 1250060            | 222137             | 17.77             | T           | 272             | 889             | 6484                      |
| <i>Wolbachia</i> wMel                         | 1267782            | 182530             | 14.40             | F           | 228             | 1261            | 4933                      |
| “ <i>Candidatus</i> Tremblaya princeps PCIT”  | 138927             | 11893              | 8.56              | O           | 6               | 5701            | 5701                      |
| <i>Spiroplasma chrysopicola</i> DF-1          | 1123322            | 88023              | 7.84              | F           | 85              | 1321            | 4997                      |
| <i>Streptomyces coelicolor</i> A3_2           | 9054847            | 530189             | 5.86              | N           | 429             | 2530            | 76766                     |
| <i>Sorangium cellulosum</i> So ce 56          | 13033779           | 741512             | 5.69              | N           | 896             | 1493            | 24734                     |
| <i>Pseudomonas fluorescens</i> F113           | 6845832            | 285418             | 4.17              | N           | 728             | 1247            | 5824                      |
| <i>Spiroplasma sabaudiense</i> Ar-1343        | 1075953            | 41544              | 3.86              | F           | 48              | 1928            | 5064                      |
| <i>Escherichia coli</i> K-12 MG1655           | 4641652            | 171560             | 3.70              | N           | 241             | 1335            | 5725                      |
| <i>Spiroplasma taiwanense</i>                 | 1086278            | 27895              | 2.57              | F           | 51              | 895             | 1782                      |
| <i>Spiroplasma apis</i> B31                   | 1160554            | 26192              | 2.26              | F           | 26              | 1363            | 2263                      |
| <i>Spiroplasma syrphidicola</i> EA-1          | 1107344            | 23847              | 2.15              | F           | 46              | 777             | 1428                      |
| <i>Spiroplasma culicicola</i> AES-1           | 1175131            | 24914              | 2.12              | F           | 50              | 849             | 2176                      |
| <i>Bacillus subtilis</i> 168                  | 4215606            | 88834              | 2.11              | N           | 76              | 5154            | 10834                     |
| <i>Opitutus</i> sp. GAS368                    | 4150883            | 79732              | 1.92              | N           | 242             | 417             | 1423                      |
| <i>Spiroplasma eriocheiris</i> DSM21848       | 1365714            | 24693              | 1.81              | F           | 34              | 1130            | 1797                      |
| <i>Serratia marcescens</i> Db11               | 5113802            | 85838              | 1.68              | N           | 108             | 2026            | 5722                      |
| “ <i>Candidatus</i> Moranella endobia PCIT”   | 538294             | 8684               | 1.61              | O           | 8               | 4022            | 4022                      |
| <i>Spiroplasma atrichopogonis</i> GNAT3597    | 1160484            | 17128              | 1.48              | F           | 37              | 1222            | 2675                      |
| <i>Pantoea vagans</i> C9-1                    | 4888338            | 71463              | 1.46              | N           | 137             | 5269            | 5727                      |
| “ <i>Candidatus</i> Pantoea carbekii”         | 1151074            | 15203              | 1.32              | T           | 4               | 5114            | 5116                      |
| <i>Sodalis praecaptivus</i> HS1               | 5159425            | 63922              | 1.24              | N           | 96              | 3901            | 6446                      |

|                                                        |         |       |      |   |    |      |      |
|--------------------------------------------------------|---------|-------|------|---|----|------|------|
| <i>Spiroplasma diminutum</i><br>CUAS-1                 | 945296  | 11215 | 1.19 | F | 26 | 777  | 967  |
| <i>Buchnera aphidicola</i> APS                         | 655725  | 7354  | 1.12 | O | 2  | 7257 | 7257 |
| " <i>Candidatus Nasuia deltocephalinicola</i> NAS-ALF" | 112091  | 370   | 0.33 | O | 2  | 296  | 296  |
| <i>Serratia symbiotica</i> SCc                         | 1762765 | 3078  | 0.17 | T | 4  | 1449 | 1468 |
| " <i>Candidatus Sulcia muelleri</i> PSPU"              | 285352  | 697   | 0.24 | O | 3  | 233  | 240  |
| " <i>Candidatus Hodgkinia cicadicola</i> Dsem"         | 143795  | 130   | 0.09 | O | 1  | 130  | 130  |
| <i>Arsenophonus</i> sp. CB                             | 836724  | 78    | 0.01 | T | 1  | 78   | 78   |
| " <i>Candidatus Endolissoclinum faulkneri</i> L2"      | 1481191 | 77    | 0.01 | O | 1  | 77   | 77   |

\*Abbreviations: N, non-host-restricted; F, facultative; T, transitional; O, obligate
