# Supplementary material for: Increased Biosynthetic Gene Dosage in a Genome-Reduced Defensive Bacterial Symbiont
Source: PubMed Central journal article supplement (PMC5698493; doi:10.1128/msystems.00096-17), 2017-11-21
Supplement: sys006172154st10.pdf [file sys006172154st10.pdf]

**Table S2** Putative pseudogenes with functional annotations in the “*Ca. D. mandela*” genome

| Locus tag   | Gene   | EC_number | Product                                                | Putative function                                   |
|-------------|--------|-----------|--------------------------------------------------------|-----------------------------------------------------|
| CD822_00056 | yehT   |           | Transcriptional regulatory protein YehT                | regulation                                          |
| CD822_00098 | kdsD   | 5.3.1.13  | Arabinose 5-phosphate isomerase KdsD                   | LPS biosynthesis                                    |
| CD822_00099 | fumA   | 4.2.1.2   | Fumarate hydratase class I, aerobic                    | TCA cycle                                           |
| CD822_00122 | araD   | 5.1.3.4   | L-ribulose-5-phosphate 4-epimerase                     | L-arabinose degradation                             |
| CD822_00124 | araA   | 5.3.1.4   | L-arabinose isomerase                                  | L-arabinose degradation                             |
| CD822_00250 | mask   | 2.7.10.2  | Tyrosine-protein kinase MasK                           |                                                     |
| CD822_00259 | ybeZ   |           | PhoH-like protein                                      | 16S rRNA maturation?                                |
| CD822_00309 | clpB_1 |           | Chaperone protein ClpB                                 | protein folding                                     |
| CD822_00310 | clpB_2 |           | Chaperone protein ClpB                                 | protein folding                                     |
| CD822_00353 | ribB   | 4.1.99.12 | 3,4-dihydroxy-2-butanone 4-phosphate synthase          | riboflavin biosynthesis                             |
| CD822_00507 | glpK   | 2.7.1.30  | Glycerol kinase                                        | glycerol utilization in glycolysis                  |
| CD822_00684 |        | 4.1.1.38  | PPi-type phosphoenolpyruvate carboxykinase             | gluconeogenesis                                     |
| CD822_00685 | feoB   |           | Ferrous iron transport protein B                       | iron uptake                                         |
| CD822_00762 | deoC   | 4.1.2.4   | Deoxyribose-phosphate aldolase                         | nucleic acid catabolism                             |
| CD822_00764 | aldA   | 1.2.1.3   | Putative aldehyde dehydrogenase AldA                   | folate biosynthesis, fucose and rhamnose metabolism |
| CD822_00766 | acoD   | 1.2.1.3   | Acetaldehyde dehydrogenase 2                           |                                                     |
| CD822_00833 | xylA   | 5.3.1.5   | Xylose isomerase                                       | Xylose catabolism                                   |
| CD822_00875 | yehU   | 2.7.13.3  | Sensor histidine kinase YehU                           | regulation                                          |
| CD822_00876 | ypdA   | 2.7.13.3  | Sensor histidine kinase YpdA                           | regulation                                          |
| CD822_00994 | kdsA_1 | 2.5.1.55  | 2-dehydro-3-deoxyphosphooctonate aldolase              | LPS biosynthesis                                    |
| CD822_00995 | kdsA_2 | 2.5.1.55  | 2-dehydro-3-deoxyphosphooctonate aldolase              | LPS biosynthesis                                    |
| CD822_01026 | dcp    | 3.4.15.5  | Peptidyl-dipeptidase dcp                               | Utilization of N-blocked peptides as carbon sources |
| CD822_01040 | queA   | 2.4.99.17 | S-adenosylmethionine:tRNA ribosyltransferase-isomerase | Formation of queuosine anticodon loop in some tRNAs |
| CD822_01042 | ilvD   | 4.2.1.9   | Dihydroxy-acid dehydratase                             | Isoleucine and valine biosynthesis                  |
| CD822_01045 | ilvB1  | 2.2.1.6   | Acetolactate synthase large subunit IlvB1              | Isoleucine and valine biosynthesis                  |
| CD822_01047 | ilvC   | 1.1.1.86  | Ketol-acid reductoisomerase                            | Isoleucine and valine biosynthesis                  |
| CD822_01049 | leuA   | 2.3.3.13  | 2-isopropylmalate synthase                             | Leucine biosynthesis                                |
| CD822_01050 | leuB   | 1.1.1.85  | 3-isopropylmalate dehydrogenase                        | Leucine biosynthesis                                |

|             |               |           |                                                                                     |                                    |
|-------------|---------------|-----------|-------------------------------------------------------------------------------------|------------------------------------|
| CD822_01097 | luxQ          | 2.7.13.3  | Autoinducer 2 sensor kinase/phosphatase LuxQ                                        | AI-2 quorum sensing                |
| CD822_01128 | trpB          | 4.2.1.20  | Tryptophan synthase beta chain                                                      | Tryptophan biosynthesis            |
| CD822_01149 | waaA          | 2.4.99.12 | 3-deoxy-D-manno-octulosonic acid transferase                                        | LPS biosynthesis                   |
| CD822_01254 | nifJ          | 1.2.7.-   | Pyruvate-flavodoxin oxidoreductase                                                  | Anaerobic fermentation             |
| CD822_01259 | ndhB          | 1.6.5.11  | NAD(P)H-quinone oxidoreductase subunit 2, chloroplastic                             | Respiratory chain                  |
| CD822_01351 | galE1         | 5.1.3.2   | UDP-glucose 4-epimerase                                                             | Galactose catabolism               |
| CD822_01384 | cysT          |           | Sulfate transport system permease protein CysT                                      | Sulfate import                     |
| CD822_01387 | cysW          |           | Sulfate transport system permease protein CysW                                      | Sulfate import                     |
| CD822_01420 | glgC_1        | 2.7.7.27  | Glucose-1-phosphate adenyltransferase                                               | Glycogen biosynthesis              |
| CD822_01421 | glgC_2        | 2.7.7.27  | Glucose-1-phosphate adenyltransferase                                               | Glycogen biosynthesis              |
| CD822_01422 | glgC_3        | 2.7.7.27  | Glucose-1-phosphate adenyltransferase                                               | Glycogen biosynthesis              |
| CD822_01423 | glgC_4        | 2.7.7.27  | Glucose-1-phosphate adenyltransferase                                               | Glycogen biosynthesis              |
| CD822_01574 | phrA          | 4.1.99.3  | Deoxyribodipyrimidine photo-lyase                                                   | Glycogen biosynthesis              |
| CD822_01627 | lptD          |           | LPS-assembly protein LptD                                                           | LPS biosynthesis                   |
| CD822_01655 | ribD          |           | Riboflavin biosynthesis protein RibD                                                | Riboflavin biosynthesis            |
| CD822_01710 | hemL          | 5.4.3.8   | Glutamate-1-semialdehyde 2,1-aminomutase                                            | Porphyrin biosynthesis             |
| CD822_01724 | mazG          | 3.6.1.1   | Nucleoside triphosphate pyrophosphohydrolase/ pyrophosphatase MazG                  | Regulation of starvation response  |
| CD822_01774 | hsrA          |           | putative transport protein HsrA                                                     | Drug efflux?                       |
| CD822_01857 | polX_1        |           | DNA polymerase/3'-5' exonuclease PolX                                               | DNA repair                         |
| CD822_01858 | polX_2        |           | DNA polymerase/3'-5' exonuclease PolX                                               | DNA repair                         |
| CD822_01873 | mpl           | 6.3.2.45  | UDP-N-acetylmuramate--L-alanyl-gamma-D-glutamyl-meso-2,6-diaminoheptandioate ligase | Murein recycling for peptidoglycan |
| CD822_01937 | rfaF          | 2.-.-.-   | ADP-heptose--LPS heptosyltransferase 2                                              | LPS biosynthesis                   |
| CD822_01965 | pgk/<br>tpi_1 |           | Bifunctional PGK/TIM                                                                | Glycolysis                         |
| CD822_01966 | pgk/<br>tpi_2 |           | Bifunctional PGK/TIM                                                                | Glycolysis                         |
| CD822_02049 | mIaE          |           | putative phospholipid ABC transporter permease protein MlaE                         | Phospholipid transport             |
| CD822_02053 | proB_1        | 2.7.2.11  | Glutamate 5-kinase                                                                  | Proline biosynthesis               |
| CD822_02054 | proB_2        | 2.7.2.11  | Glutamate 5-kinase 1                                                                | Proline biosynthesis               |
| CD822_02226 | rplY          |           | 50S ribosomal protein L25                                                           | Ribosomal protein                  |
| CD822_02349 | lpxK_1        | 2.7.1.130 | Tetraacyldisaccharide 4'-kinase                                                     | Lipid A biosynthesis               |
| CD822_02350 | lpxK_2        | 2.7.1.130 | Tetraacyldisaccharide 4'-kinase                                                     | Lipid A biosynthesis               |
| CD822_02363 | malP          | 2.4.1.1   | Maltodextrin phosphorylase                                                          | Maltodextrin utilization           |
| CD822_02378 | xpsE          |           | Type II secretion system protein E                                                  | Protein secretion                  |

|                    |        |           |                                                                |                                      |
|--------------------|--------|-----------|----------------------------------------------------------------|--------------------------------------|
| <b>CD822_02389</b> | acsA   | 6.2.1.1   | Acetyl-coenzyme A synthetase                                   | Acetyl-CoA biosynthesis from acetate |
| <b>CD822_02427</b> | arnB   | 2.6.1.87  | UDP-4-amino-4-deoxy-L-arabinose--oxoglutarate aminotransferase | Lipid A modification                 |
| <b>CD822_02428</b> | desV   | 2.6.1.106 | dTDP-3-amino-3,4,6-trideoxy-alpha-D-glucose transaminase       | Desosamine biosynthesis              |
| <b>CD822_02456</b> | gmd    | 4.2.1.47  | GDP-mannose 4,6-dehydratase                                    | LPS biosynthesis                     |
| <b>CD822_02458</b> | fcl_1  | 1.1.1.271 | GDP-L-fucose synthase                                          | LPS biosynthesis                     |
| <b>CD822_02494</b> | resA   |           | Thiol-disulfide oxidoreductase ResA                            | Cytochrome c assembly                |
| <b>CD822_02510</b> | fbpC2  | 3.6.3.30  | Fe(3+) ions import ATP-binding protein FbpC 2                  | Iron uptake                          |
| <b>CD822_02565</b> | glgA   | 2.4.1.21  | Glycogen synthase                                              | Glycogen biosynthesis                |
| <b>CD822_02629</b> | mfppA  | 3.1.3.79  | Mannosylfructose-phosphate phosphatase                         | Osmotic stress response              |
| <b>CD822_02652</b> | ettA   |           | Energy-dependent translational throttle protein EttA           | Regulation of translation            |
| <b>CD822_02727</b> | aceB   | 2.3.3.9   | Malate synthase                                                | Glyoxylate cycle                     |
| <b>CD822_02780</b> | rfaQ   | 2.-.-.-   | Lipopolysaccharide core heptosyltransferase RfaQ               | LPS biosynthesis                     |
| <b>CD822_02795</b> | ptsI_1 | 2.7.3.9   | Phosphoenolpyruvate-protein phosphotransferase                 | Sugar uptake                         |
| <b>CD822_02796</b> | ptsI_2 | 2.7.3.9   | Phosphoenolpyruvate-protein phosphotransferase                 | Sugar uptake                         |
| <b>CD822_02839</b> |        | 1.2.1.26  | Alpha-ketoglutaric semialdehyde dehydrogenase                  | Xylose catabolism                    |
| <b>CD822_02843</b> | nsaE   | 4.1.2.45  | Trans-O-hydroxybenzylidenepyruvate hydratase-aldolase          | Naphthalene degradation              |
| <b>CD822_02872</b> | tal    | 2.2.1.2   | Transaldolase                                                  | Pentose phosphate pathway            |
| <b>CD822_02889</b> | kdpA   |           | Potassium-transporting ATPase potassium-binding subunit        | Potassium transport                  |
| <b>CD822_02895</b> | kdsB_1 | 2.7.7.38  | 3-deoxy-manno-octulosonate cytidylyltransferase                | LPS biosynthesis                     |
| <b>CD822_02896</b> | kdsB_2 | 2.7.7.38  | 3-deoxy-manno-octulosonate cytidylyltransferase                | LPS biosynthesis                     |
| <b>CD822_02897</b> | crh    |           | HPr-like protein Crh                                           | Carbon catabolite repression         |
